# Supplementary material for: Thymic Stromal Lymphopoietin (TSLP) Is Cleaved by Human Mast Cell Tryptase and Chymase
Source: MDPI journal article supplement (doi:10.3390/ijms25074049), 2024-04-05
Supplement: s1 [file s1]

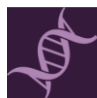

# Supplementary Material: Thymic Stromal Lymphopoietin (TSLP) Is Cleaved by Human Mast Cell Tryptase and Chymase

Luisa Canè <sup>1,2,3,†</sup>, Remo Poto <sup>1,2,†</sup>, Francesco Palestra <sup>1,2</sup>, Ilaria Iacobucci <sup>3,4</sup>, Marinella Pirozzi <sup>5</sup>, Seetharaman Parashuraman <sup>5</sup>, Anne Lise Ferrara <sup>1,2</sup>, Amalia Illiano <sup>6</sup>, Antonello La Rocca <sup>6</sup>, Edoardo Mercadante <sup>6</sup>, Piero Pucci <sup>3</sup>, Gianni Marone <sup>1,2,5,7</sup>, Giuseppe Spadaro <sup>1,2,7</sup>, Stefania Loffredo <sup>1,2,5,7</sup>, Maria Monti <sup>3,4,\*</sup> and Gilda Varricchi <sup>1,2,5,7,\*</sup>

<sup>1</sup> Department of Translational Medical Sciences, University of Naples Federico II, 80131 Naples, Italy; canel@ceinge.unina.it (L.C.); remo.poto@gmail.com (R.P.); f.palestra97@gmail.com (F.P.); annelisefferrara@gmail.com (A.L.F.); marone@unina.it (G.M.); spadaro@unina.it (G.S.); stefania.loffredo2@unina.it (S.L.)

<sup>2</sup> World Allergy Organization (WAO), Center of Excellence (CoE), 80131 Naples, Italy

<sup>3</sup> CEINGE Advanced Biotechnologies F. Salvatore, 80131 Naples, Italy; ilaria.iacobucci@unina.it (I.I.); pucci@unina.it (P.P.)

<sup>4</sup> Department of Chemical Sciences, University of Naples Federico II, 80126 Naples, Italy

<sup>5</sup> Institute of Experimental Endocrinology and Oncology, National Research Council (CNR), 80131 Naples, Italy; m.pirozzi@ieos.cnr.it (M.P.); seetharaman.parashuraman@cnr.it (S.P.)

<sup>6</sup> Thoracic Surgery Unit—Istituto Nazionale Tumori IRCCS Fondazione G. Pascale, 80131 Naples, Italy; a.illiano@istitutotumori.na.it (A.I.); a.larocca@istitutotumori.na.it (A.L.R.); edoardo.mercadante@istitutotumori.na.it (E.M.)

<sup>7</sup> Center for Basic and Clinical Immunology Research (CISI), University of Naples Federico II, 80131 Naples, Italy

\* Correspondence: montimar@unina.it (M.M.); gildanet@gmail.com (G.V.)

† These authors contributed equally to this work.

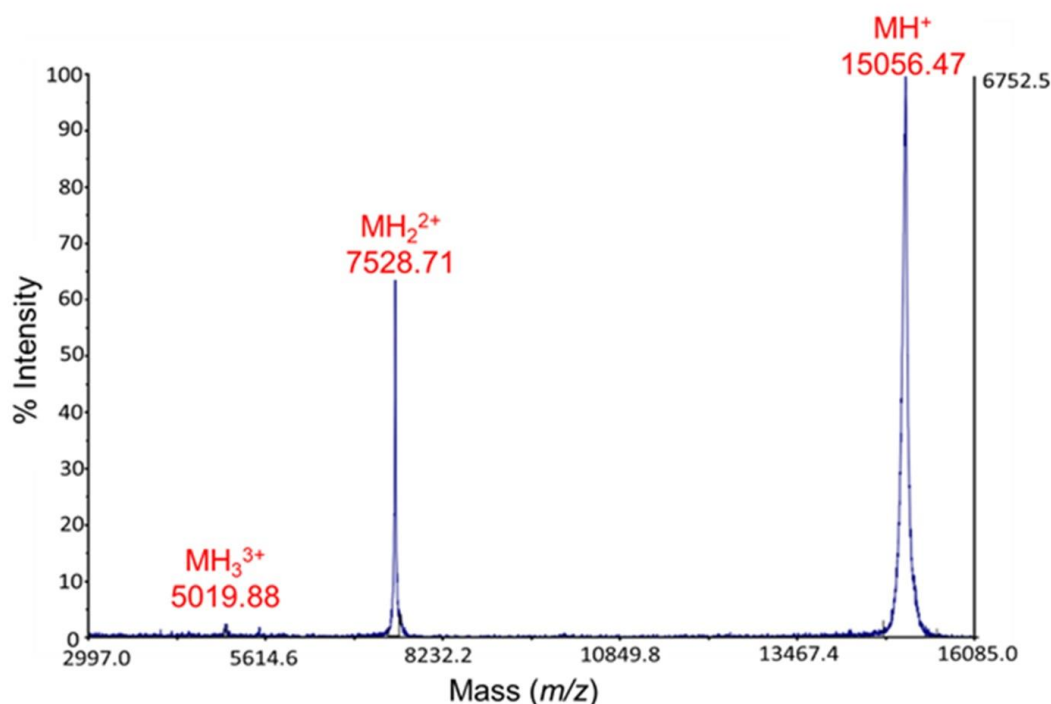

Figure 1S\_Canè et al.

**Figure S1.** MALDI-MS spectra of recombinant human TSLP in linear mode. The mass signals at  $m/z$  15056.47, 7528.71, and 5019.88 correspond to the mono-, doubly- and triply-charged ions of the intact protein, respectively. From the measured mass value of these ions, a molecular weight of 15056.18 for TSLP could be calculated in agreement with the expected value (15056.46 Da).
